# Supplementary material for: Light-driven charge storage enhancement in NiSSe nanoparticles for high-performance photo-supercapacitors
Source: Royal Society of Chemistry journal article supplement (doi:10.1039/d5nj04688b), 2025-12-12
Supplement: d5nj04688b1.pdf [file d5nj04688b1.pdf]

## Supporting Information

### **Light-driven charge storage enhancement in NiSSe nanoparticles for high-performance photo-supercapacitors**

Kamran Shahzad,<sup>abc</sup> Muhammad Arif,<sup>c</sup> Hafiz Zahid Shafi,<sup>\*b</sup>

Muhammad Rahim,<sup>a</sup> and Ting Zhu<sup>\*c</sup>

<sup>a</sup> *Department of Physics, Faculty of Sciences, International Islamic University  
Islamabad, 44000, Pakistan*

<sup>b</sup> *National Institute of Lasers and Optronics College, Pakistan Institute of Engineering  
and Applied Sciences, Nilore, Islamabad 45650, Pakistan*

<sup>c</sup> *School of Physics and Electronic Information, Yunnan Normal University, 768, Juxian  
Street, Kunming 650500, Yunnan, China*

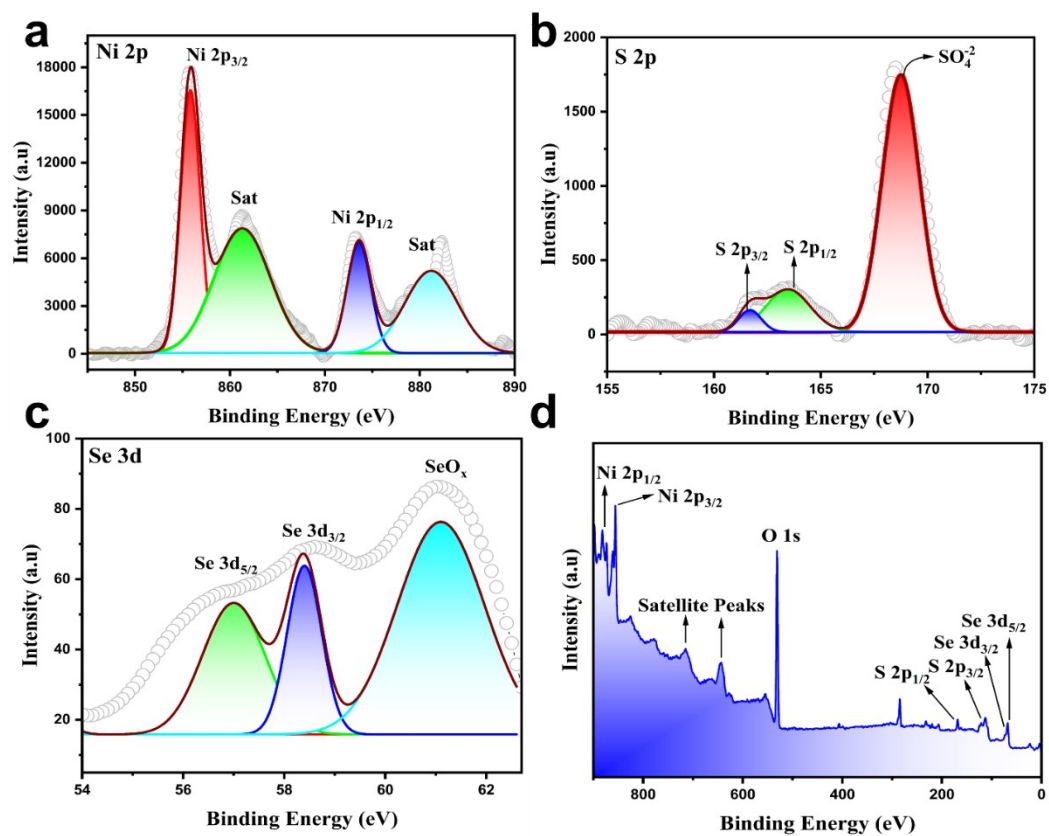

**Fig. S1.** XPS spectra of (a) Ni 2p, (b) S 2p, (c) Se 3d, and (d) XPS overview.

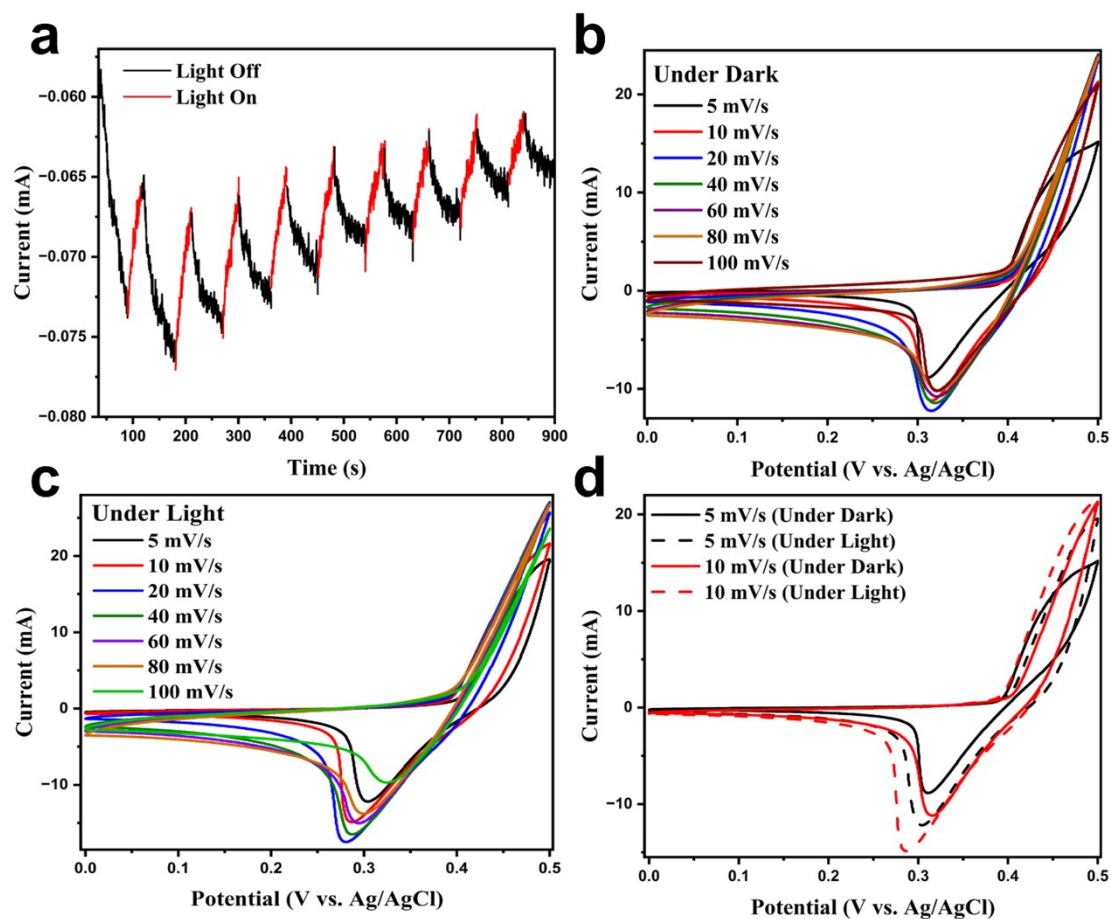

**Fig. S2.** (a) Photocurrent delivered under light on and off with time intervals of 20 s, CV curves obtained (b) under dark and (c) under light, and (d) comparison of CV curves under light and dark at scan rates of 5 and 10 mV s<sup>-1</sup>, respectively.
